# Supplementary material for: Endogenous piRNAs Can Interact with the Omicron Variant of the SARS-CoV-2 Genome
Source: MDPI journal article supplement (doi:10.3390/cimb45040193), 2023-04-03
Supplement: s1 [file s1]

Table S1. Characteristics of human piRNA interaction with gRNA SARS-CoV-2 omicron strain

| piRNA       | Binding site, nt | Region gRNA | $\Delta G$ , kJ/mol | $\Delta G/\Delta G_m$ , % | piRNA length, nt |
|-------------|------------------|-------------|---------------------|---------------------------|------------------|
| piR-2388809 | 156              | 5'UTR       | -132                | 84                        | 30               |
| piR-7726820 | 538              | CDS         | -132                | 81                        | 31               |
| piR-8103557 | 641              | CDS         | -136                | 81                        | 33               |
| piR-7741905 | 642              | CDS         | -130                | 80                        | 31               |
| piR-3769469 | 1778             | CDS         | -138                | 80                        | 33               |
| piR-3942773 | 4207             | CDS         | -138                | 86                        | 30               |
| piR-4093935 | 4210             | CDS         | -136                | 82                        | 31               |
| piR-1942565 | 4233             | CDS         | -138                | 80                        | 32               |
| piR-4167634 | 5806             | CDS         | -140                | 81                        | 34               |
| piR-331194  | 8395             | CDS         | -138                | 80                        | 34               |
| piR-912075  | 9063             | CDS         | -140                | 80                        | 33               |
| piR-2352720 | 9084             | CDS         | -138                | 81                        | 34               |
| piR-1646666 | 9792             | CDS         | -136                | 80                        | 33               |
| piR-2490582 | 9973             | CDS         | -138                | 80                        | 33               |
| piR-1816055 | 9985             | CDS         | -138                | 80                        | 34               |
| piR-1825361 | 10573            | CDS         | -138                | 80                        | 31               |
| piR-1683664 | 10941            | CDS         | -140                | 80                        | 34               |
| piR-1491787 | 17067            | CDS         | -138                | 80                        | 32               |
| piR-7941247 | 24308            | CDS         | -138                | 84                        | 31               |
| piR-8034406 | 24308            | CDS         | -138                | 84                        | 30               |
| piR-6685274 | 24308            | CDS         | -136                | 85                        | 30               |
| piR-7611581 | 24308            | CDS         | -134                | 81                        | 31               |
| piR-418459  | 24309            | CDS         | -136                | 88                        | 29               |
| piR-752851  | 24310            | CDS         | -130                | 85                        | 28               |
| piR-1173337 | 24310            | CDS         | -132                | 87                        | 28               |
| piR-703629  | 25615            | CDS         | -142                | 82                        | 31               |
| piR-1525356 | 26049            | CDS         | -136                | 80                        | 32               |
| piR-2599982 | 27012            | CDS         | -144                | 82                        | 34               |
| piR-806264  | 28360            | CDS         | -142                | 83                        | 33               |
| piR-1125648 | 28636            | CDS         | -134                | 82                        | 33               |
| piR-1134823 | 29030            | CDS         | -130                | 82                        | 31               |
| piR-3158024 | 29377            | CDS         | -130                | 80                        | 32               |
